# Supplementary material
Source: Springer Nature journal article supplement (https://www.springermedizin.de/resource/supplementary/13002_2012_311_MOESM2_ESM.pdf/9627716)
Supplement: MOESM2 [file 9627716]

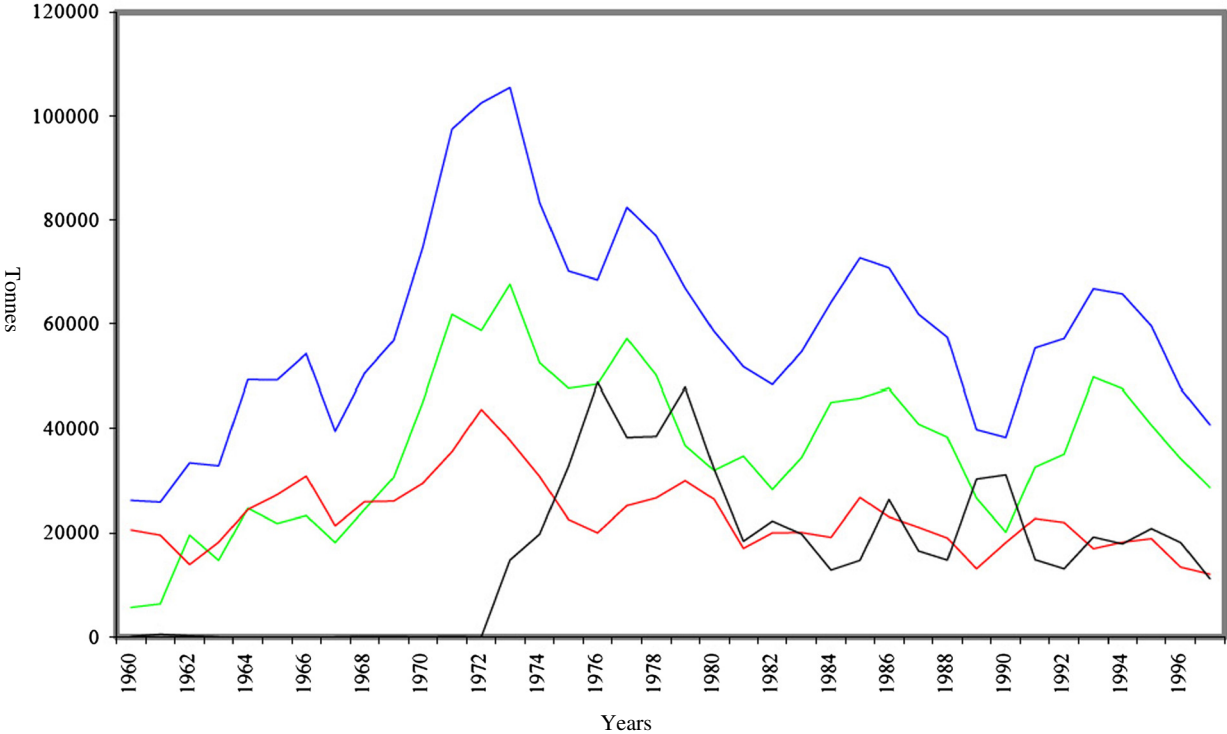

Legend

Green line – Industrial production

Red line – artesanal production

Blue line – total production

Black line – importation
